# Supplementary material
Source: PubMed Central journal article supplement (PMC3785721)
Supplement: 1304334110_pnas.201304334SI.pdf [file 1304334110_pnas.201304334SI.pdf]

# Supporting Information

Pérez Navarro et al. 10.1073/pnas.1304334110

## SI Materials and Methods

Photosystem II (PSII) core complex preparations from wild-type *Thermosynechococcus elongatus* (1) were isolated as described earlier (2–4). X-band samples were prepared with the following modifications. After the loading of the Ni column with the solubilized membranes, the resin was washed with buffer 2 [1 M betaine, 10% (wt/vol) glycerol, 40 mM Mes, 15 mM MgCl<sub>2</sub>, 15 mM CaCl<sub>2</sub>, 100 mM NaCl, 1 mM L-histidine, 0.03% (wt/vol) β-DM, pH 6.5] until the optical density of the eluate at 665 nm decreased below 0.05 (~15 h). Then, PSII core complexes were eluted with buffer 3 [1 M betaine, 40 mM Mes, 15 mM MgCl<sub>2</sub>, 15 mM CaCl<sub>2</sub>, 200 mM NaCl, 180 mM L-histidine, 0.06% (wt/vol) β-DM, pH 6.5]. The eluate was then concentrated and washed in buffer 4 (1 M betaine, 15 mM MgCl<sub>2</sub>, and 15 mM CaCl<sub>2</sub>) by using centrifugal filter devices (Ultrafree-15; Millipore) until the Mes concentration was estimated to be lower than 0.5 mM. <sup>15</sup>N-labeled PSII samples were prepared from cells grown in a medium with <sup>15</sup>NH<sub>4</sub>Cl and <sup>15</sup>NO<sub>3</sub><sup>-</sup> salts. PSII core complexes were finally resuspended in buffer 4 (+ 40 mM Mes) at a Chl concentration of ~2–3 mg Chl·ml<sup>-1</sup> and stored in liquid N<sub>2</sub> until use. PSII material for Q/W-band measurements was instead stored at –80 °C until use. The S<sub>2</sub> state was generated by short (5 s) white-light illumination with a tungsten lamp at 200 K, using an ethanol bath cooled down with dry ice. Resuspension of the PSII samples in labeled H<sub>2</sub><sup>17</sup>O (90%) buffer was achieved as reported in ref. 5. Ammonia was added at a ratio of 1:10 vol/vol to the samples from a stock solution of 1 M ammonium chloride (<sup>14</sup>NH<sub>4</sub>Cl) in 1 M Hepes (pH 7.6) buffer, yielding a free-base NH<sub>3</sub> concentration of 2 mM. PSII samples were reconcentrated using Millipore microcentrifuge filters to the desired concentration. Samples were then placed in Q/W-band tubes and left in complete darkness for ~10 min. To observe a minimally perturbed S<sub>2</sub> multiline signal, the sample was illuminated at 185 K (ethanol/liquid N<sub>2</sub> bath). To observe the ammonia-modified multiline, the sample was first illuminated at 200 K and then subsequently annealed at ~260 K (ethanol + CO<sub>2</sub>/dry ice bath) for 30 s before freezing to 80 K. X-band samples were given two saturating YAG (532 nm) light flashes and 1 h dark adaptation before the addition of <sup>14</sup>NH<sub>4</sub>Cl solution to maximize S<sub>2</sub> state yields.

Time-resolved membrane inlet mass spectrometry (TR-MIMS) experiments were performed in a stirred, temperature-controlled (20 °C) membrane-inlet cell (165 μL volume) connected to a magnetic sector field isotope ratio mass spectrometer (ThermoFinnigan Delta<sup>Plus</sup> XP) via a cooling trap (liquid N<sub>2</sub>). Samples were loaded in darkness. After 20 min of degassing, the sample was advanced to the S<sub>2</sub> state with one saturating Xe-lamp flash. Subsequently the sample was rapidly diluted with H<sub>2</sub><sup>18</sup>O (97%, 8 ms mixing time) and two further flashes were applied (interflash separation 10 ms), generating O<sub>2</sub>. The delay between the dilution and the double flash was incremented between 8 ms and 10 s. The final <sup>18</sup>O sample enrichment was 22%. Molecular oxygen dissolved in the H<sub>2</sub><sup>18</sup>O was removed from the delivery syringe (modified Hamilton CR-700-50) by glucose/glucose oxidase and catalase (6). After 5 min, four additional flashes were given at 2 Hz and used for normalization. Data analysis was performed as described earlier (6–8).

Density functional theory calculations used an initial model geometry taken from Ames et al. (9) (model 1d2' of that study), and were performed with the quantum chemical program system “ORCA” (28). This structure was reoptimized for the ammonia-modified S<sub>2</sub> state, after replacement of W1 with NH<sub>3</sub> (1d2'-NH<sub>3</sub>) (Table S5). Geometry optimizations used the BP86 functional (10, 11) along with the 2010 dispersion corrections of Grimme

(12) and the zero-order regular approximation (ZORA) to account for scalar relativistic effects (13–15). All atoms except carbon and hydrogen, for which the split-valence polarized SVP basis set was used, were described with the relativistically contracted def2-TZVP(-f) basis sets (16). Decontracted def2-TZVP/J basis sets (17) were used for the resolution of the identity approximation to Coulomb exchange (RI-J). Tight self-consistent field (SCF) convergence and regular integration grids (Grid4 in ORCA convention) were applied. Optimizations were performed with the conductor-like screening model (COSMO) (18) with a dielectric constant of 8.0. Harmonic vibrational frequencies were computed for the optimized geometries, using numerical two-side differentiation with an increment of 0.01 Bohr. Both structures, with and without NH<sub>3</sub>, were confirmed as genuine minima by the absence of imaginary frequencies (negative Hessian eigenvalues).

Exchange coupling constants were computed by the broken symmetry (BS)-DFT approach, using the TPSSh functional (19) with the RI-J approximation to the Coulomb exchange and the chain-of-spheres approximation to exact exchange (20). Scalar relativistic effects were included with ZORA paired with the segmented all-electron relativistically contracted (SARC) def2-TZVP(-f) basis sets and the decontracted def2-TZVP/J Coulomb fitting basis sets for all atoms. Increased integration grids (Grid5 and GridX5) were used in the calculation of all magnetic parameters. For the calculation of the hyperfine tensors, specially constructed basis sets based on SARC def2-TZVP but with added flexibility in the core region were used for the N and O atoms. These basis sets are described in ref. 21. The radial integration grids were increased to an integration accuracy of 9 (in ORCA convention) for <sup>14</sup>N and <sup>17</sup>O. Picture change effects were included in the calculation of EPR parameters. Details regarding the application of the BS-DFT approach for the calculation of EPR parameters in manganese systems can be found in recent work (9, 22–27).

## SI EPR Theory/Simulations

**EPR and <sup>55</sup>Mn-Electron Nuclear Double Resonance Data and Spin Hamiltonian Simulations.** Spectra were simultaneously fitted assuming an effective spin  $S = 1/2$  ground state (for details, see refs. 26, 29). The basis set that describes the Mn-tetramer spin manifold can be built from the product of the eigenstates of the interacting spins:

$$|\frac{1}{2} MI_1 I_2 I_3 I_4 m_1 m_2 m_3 m_4 \rangle. \quad [S1]$$

Here,  $M_i$  refers to the electronic magnetic sublevel,  $\pm 1/2$ ;  $I_i$  takes the value 5/2 for each <sup>55</sup>Mn; and each  $m_i$  takes the values  $-I_i, 1 - I_i, \dots, I_i - 1, I_i$ .

The spin Hamiltonian that describes the spin manifold is

$$\hat{H} = \beta_e \vec{B}_0 \cdot \hat{G} \cdot \vec{S} + \sum_i (g_n \beta_n \vec{B}_0 \cdot \vec{I}_i + \vec{S} \cdot \hat{A}_i \cdot \vec{I}_i). \quad [S2]$$

It contains (i) the electronic Zeeman term for the total electronic spin, (ii) nuclear Zeeman terms for the <sup>55</sup>Mn nuclei, and (iii) hyperfine terms for the <sup>55</sup>Mn nuclei. This Hamiltonian was used to simulate all spectra. The electron Zeeman term was treated exactly. The nuclear Zeeman and hyperfine terms were treated using second-order perturbation theory. The nuclear quadrupole coupling was not explicitly considered. Spectral simulations were performed numerically, using the EasySpin package (30) in MATLAB.

Historically, ammonia binding was thought to significantly alter the electronic structure of the oxygen-evolving complex (OEC), as proposed by Peloquin et al. (29). There, it was suggested that NH<sub>3</sub> binding led to an interchange of the valence states of the Mn cluster such that the only Mn in the +III oxidation state was located at a different Mn site (29). This proposal now seems unlikely. As shown in the main text, the Mn<sub>D1</sub>-His332 signal, which can be considered a spin probe of the electronic structure of the OEC, does not significantly change upon NH<sub>3</sub> binding, requiring that the oxidation state of Mn<sub>D1</sub>, the most likely candidate for the Mn<sup>III</sup>, does not change (9, 26, 27, 31, 32). The effect of NH<sub>3</sub> binding is probably more similar to that seen upon the replacement of the Ca<sup>2+</sup> ion with Sr<sup>2+</sup>. Sr<sup>2+</sup> has only a subtle effect on the electronic structure of the OEC, perturbing the Mn<sub>D1</sub><sup>III</sup> ion, which leads to changes in the hyperfine tensor anisotropy of all four Mn nuclei and thus a modified S<sub>2</sub> multiline EPR spectrum (26). Simulations of the EPR and <sup>55</sup>Mn-electron nuclear double resonance (ENDOR) data are shown in Fig. S1 and support this basic model. The fitted *g* and hyperfine tensors reported in Table S1 are approximately the same in terms of both magnitude and symmetry in both the control and the NH<sub>3</sub> sample, confirming that the oxidation state pattern for the OEC does not change upon ammonia binding, consistent with the <sup>14</sup>N-electron spin echo envelope modulation (ESEEM) Mn<sub>D1</sub>-His332 data shown in Fig. 2 C and D in the main text.

**<sup>14</sup>N-ESEEM/<sup>17</sup>O-Electron-Electron Double-Resonance-Detected NMR Data and Spin Hamiltonian Simulations.** Spectra were simultaneously fitted assuming an effective spin *S* = 1/2 ground state (for details, see ref. 5). The basis set that describes the ligand-Mn-tetramer spin manifold (excluding <sup>55</sup>Mn nuclei) can be built from the product of the eigenstates of the interacting spins:

$$|\frac{1}{2} M I m\rangle. \quad [S3]$$

Here *M* refers to the electronic magnetic sublevels ±1/2; *I* takes the value 1 for <sup>14</sup>N and 5/2 for <sup>17</sup>O; and *m<sub>i</sub>* takes the values −*I<sub>i</sub>*, 1 − *I<sub>i</sub>*, ..., *I<sub>i</sub>* − 1, *I<sub>i</sub>*.

The spin Hamiltonian that describes the single nucleus–electron spin manifold is

$$\hat{H} = \beta_e \vec{B}_0 \cdot \hat{G} \cdot \vec{S} + g_o \beta_n \vec{B} \cdot \vec{I} + \vec{S} \cdot \hat{A} \cdot \vec{I}. \quad [S4]$$

It contains (i) the electronic Zeeman term for the total electronic spin, (ii) the nuclear Zeeman term for the <sup>14</sup>N/<sup>17</sup>O nucleus, and (iii) the hyperfine term for the <sup>14</sup>N/<sup>17</sup>O nucleus. This Hamiltonian was used to simulate all <sup>14</sup>N-ESEEM spectra and <sup>17</sup>O-electron–electron double-resonance–detected NMR (EDNMR) data.

X-band three-pulse ESEEM measurements were performed on both <sup>14</sup>N-PSII and <sup>15</sup>N-PSII treated with ammonia (<sup>14</sup>NH<sub>3</sub>). As PSII contains additional cofactors such as cyt<sub>b559</sub> and cyt<sub>c550</sub>, which also exhibit nitrogen couplings, annealed-minus-dark difference spectra are reported. The annealed S<sub>2</sub> spectrum is generated by low-temperature illumination (185–200 K) and subsequent annealing to allow the ammonia to bind (260 K), whereas the dark S<sub>1</sub> spectrum represents the initial state. Nitrogen signals attributable to the OEC are seen only in the S<sub>2</sub> state whereas the cyt<sub>b559</sub> and cyt<sub>c550</sub> nitrogen signals should be unchanged in both S<sub>1</sub> and S<sub>2</sub>. The annealed-minus-dark subtraction introduced no artifacts as evidenced by the comparison of the <sup>14</sup>N-PSII and universally labeled <sup>15</sup>N-PSII data, which are essentially identical. The annealed-minus-dark difference spectrum is assigned to a single <sup>14</sup>N of the Mn<sub>4</sub>O<sub>5</sub>Ca cluster-bound ammonia. This species displays three sharp nuclear-quadrupole lines at ~0.5, 1.0, and 1.5 MHz in the Fourier-transformed spectra. Spin Hamiltonian simulations of the ESEEM spectra, measured at a series of τ-values, are shown in Fig. S2, *Left* and all fitted parameters are given in Table S2 along with

DFT estimates for the hyperfine and quadrupole couplings. Our DFT calculations nominally reproduce the small experimental isotropic hyperfine coupling and the magnitude of the quadrupole coupling/electric field gradient. A multipole estimate was used to estimate the through-space interaction (*A*<sub>dip</sub>), which suggests *A*<sub>dip</sub> should be approximately axially symmetric, as observed experimentally. This simple calculation does, however, overestimate *A*<sub>dip</sub> by a factor of 2.

The fitted spin Hamiltonian parameters of the <sup>14</sup>NH<sub>3</sub> coupling reported in Table S2 are similar to those reported in the earlier higher-plant study (33). As seen in this earlier study, the quadrupole coupling shows significant asymmetry (*η* ≈ 0.5). The recent crystal structure provides a rationale for this anomalous result, assuming NH<sub>3</sub> displaces the W1 ligand. W1 is in H-bonding distance to the D1-Asp61 and the Asp61/W1 couple has been proposed as important for proton movement from the OEC (34–36). Thus, an NH<sub>3</sub> ligand in the site of W1 is likely to have an electrostatic environment that is distorted away from axial symmetry. The role of such counter ions has recently been shown to be important for the calculation of quadrupole couplings of Mn complexes (21). As Asp61 is not included in our DFT models, this asymmetry is not reproduced in our calculations, although the magnitude of the quadrupole coupling is reproduced.

As a final proof that this signal represents a <sup>14</sup>NH<sub>3</sub> ligand to the OEC, <sup>15</sup>NH<sub>3</sub> instead of <sup>14</sup>NH<sub>3</sub> was added to <sup>14</sup>N-PSII. In annealed-minus-dark difference spectra, the modulation described above was lost, replaced with transitions that now appear near 0 MHz in the Fourier-transformed spectra, consistent with a <sup>15</sup>N ligand interaction.

Spin Hamiltonian simulations were also performed for the <sup>14</sup>N-His332 signal seen using Q-band ESEEM, shown in Fig. S2, *Right*. A complete parameter list is given in Table S2 and compared with earlier literature data along with DFT estimates for the hyperfine and quadrupole couplings. As with the NH<sub>3</sub> ligand, our DFT calculations nominally reproduce the experimental isotropic hyperfine coupling and quadrupole coupling, and the DFT values are not significantly changed by the replacement of W1 with NH<sub>3</sub>. It is noted that the fitted parameters are slightly different from those of our previous report using W-band EDNMR (5) but are similar to those of earlier ESEEM studies of Yeagle et al. (37) and Stich et al. (38), measured using PSII purified from spinach and *Synechocystis* (6803), respectively. This is currently under investigation and may reflect partial breakdown of the *S* = 1/2 ground-state approximation at W-band. In addition, current simulations do not very well reproduce ESEEM data traces collected using longer τ-values (>300 ns) compared to those with shorter τ-values (<300 ns). This is also being further investigated.

**<sup>1</sup>H-ENDOR.** Protons in the vicinity of the OEC can be readily measured using Q-band <sup>1</sup>H-ENDOR (5). The magnitude of a proton coupling within a metallocofactor is usually derived from a simple dipolar (through-space) interaction between the electron spin and the nearby proton spin and thus allows the distance of the proton to the metal center(s) to be obtained. The width of the <sup>1</sup>H-ENDOR signal envelope (of ≈9 MHz) for the OEC in the S<sub>2</sub> state has previously been assigned to the terminal water/OH-ligands (W1/W2) of Mn<sub>A4</sub>, i.e., <sup>1</sup>H protons ~2.4–3 Å away from one of the Mn ions of the OEC that carries a spin projection of ~1 (5, 39–41). In addition, the width of the envelope has been suggested to exclude a protonated oxygen bridge (μ-hydroxo).

The <sup>1</sup>H-ENDOR envelopes for <sup>14</sup>N-PSII with and without ammonia (<sup>14</sup>NH<sub>3</sub>) are shown in Fig. S3A. The two are very similar, suggesting that the nearest approach of a <sup>1</sup>H nucleus to the Mn ions is essentially the same for the OEC with and without an NH<sub>3</sub> ligand. In our DFT models, the protons of both the NH<sub>3</sub> and the W1/W2 ligands are between 2.4 and 2.7 Å away from Mn<sub>A4</sub>. As such, the <sup>1</sup>H-ENDOR envelope is expected to not change considerably upon addition of ammonia, as observed

experimentally. Importantly, the absence of a large proton coupling suggests ammonia does not replace one of the oxygen bridges ( $\mu$ -oxo) of the OEC, forming an amido ( $-\text{NH}_2$ ) bridge as previously suggested in ref. 33.

**$^{17}\text{O}$ -Mims ENDOR.** Water molecules that are not directly coordinated to the Mn ions are not well visualized by using W-band EDNMR, and they provide only a small contribution to the signal envelope (5). These species, i.e., the waters bound to the  $\text{Ca}^{2+}$  ion, W3 and W4, can instead be measured using W-band Mims ENDOR (5). Fig. S3B shows the  $^{17}\text{O}$ -Mims ENDOR spectra of W3/W4 in PSII samples with and without added ammonia. In both samples, a similar signal envelope is observed centered at the Larmor frequency of  $^{17}\text{O}$  [ $\nu_{\text{N}}(^{17}\text{O}) \approx 19.6$  MHz], suggesting ammonia does not displace W3 or W4. The signal has a width of  $<1$  MHz (FWHM) and a near-Lorentzian lineshape, with a resolved splitting of 0.5 MHz.

**$^{17}\text{O}$ -EDNMR Simulations/Power Dependence.** Spin Hamiltonian simulations of the EDNMR signals in Fig. 3 ( $^{14}\text{N}$ -PSII) and Fig. S4 ( $^{15}\text{N}$ -PSII) were performed as described in ref. 5. All parameters are given in Table S3. The anisotropic (dipolar,  $A_{\text{dip}}$ ) component for each of the three  $^{17}\text{O}$  hyperfine tensors (large, intermediate, and matrix) was kept fixed to that reported in ref. 5 in both the native and the ammonia-treated samples along with all linewidths. It is noted that the fitted linewidths presumably represent the unresolved quadrupole splittings. In addition, the unresolved quadrupole is expected to lead to the nonequal peak intensities for the double-quantum peaks of each  $^{17}\text{O}$  doublet. As such, the relative intensities of each doublet peak are allowed to vary by 50%.

As the  $^{17}\text{O}$  double-quantum region for the ammonia-treated sample was symmetric about twice the  $^{17}\text{O}$  Larmor frequency,

only two hyperfine couplings (large and intermediate) needed to be included to reproduce the double-quantum spectral profile.

In the  $^{17}\text{O}$ -EDNMR experiments described here, the line intensities of the three different  $^{17}\text{O}$  species predominately depend on the magnitude of the anisotropic (dipolar) coupling  $A_{\text{dip}}$  (5, 42) and the amplitude of the pump pulse [high turning angle (HTA) pulse]. As such, the relative line intensity attributable to different  $^{17}\text{O}$  species will change as the amplitude of the HTA pulse is varied. In Rapatskiy et al. (5), the amplitude of the HTA pulse was set such that the signal from the largest coupled species was maximal. Increasing the amplitude of the HTA pulse begins to suppress the largest coupled species relative to more weakly coupled species; it effectively enhances the contribution of the more weakly coupled components. Thus, by monitoring the power dependence (the magnitude of the EDNMR signal as a function of the HTA pulse amplitude) at different positions within the signal envelope, more information on the contribution of each species can be obtained. In a simple sense, the power dependence represents another way to discern the number of species that make up the signal envelope. Unfortunately, the power dependence cannot yet be simulated, and thus, the contribution of each  $^{17}\text{O}$  component is simply fitted (5).

The power dependence of the  $^{17}\text{O}$ -EDNMR envelope is shown in Fig. S4 C and D. In the control sample, the power dependence of the satellite lines (strongly coupled species) about the  $^{17}\text{O}$  Larmor frequency was significantly different from that of the central line (weakly coupled, matrix species) at the  $^{17}\text{O}$  Larmor frequency. This is in contrast to the ammonia-treated sample. Here the power dependences of the satellites and the central line are more similar, suggesting the range of couplings that make up the envelope has decreased. That is to say, the  $^{17}\text{O}$  profile in the ammonia-treated sample contains a smaller contribution from a third matrix component, i.e., W1.

1. Sugiura M, Boussac A, Noguchi T, Rappaport F (2008) Influence of histidine-198 of the D1 subunit on the properties of the primary electron donor, P680, of photosystem II in *Thermosynechococcus elongatus*. *Biochim Biophys Acta* 1777(4):331–342.
2. Boussac A, et al. (2004) Biosynthetic  $\text{Ca}^{2+}/\text{Sr}^{2+}$  exchange in the photosystem II oxygen-evolving enzyme of *Thermosynechococcus elongatus*. *J Biol Chem* 279(22):22809–22819.
3. Sander J, et al. (2010) Functional characterization and quantification of the alternative PsbA copies in *Thermosynechococcus elongatus* and their role in photoprotection. *J Biol Chem* 285(39):29851–29856.
4. Nowaczyk MM, et al. (2012) Deletion of *psbJ* leads to accumulation of Psb27-Psb28 photosystem II complexes in *Thermosynechococcus elongatus*. *Biochim Biophys Acta* 1817(8):1339–1345.
5. Rapatskiy L, et al. (2012) Detection of the water binding sites of the oxygen-evolving complex of Photosystem II using W-band  $^{17}\text{O}$  ELDOR-detected NMR spectroscopy. *J Am Chem Soc* 134(40):16619–16634.
6. Messinger J, Badger M, Wydrzynski T (1995) Detection of one slowly exchanging substrate water molecule in the  $\text{S}_2$  state of photosystem II. *Proc Natl Acad Sci USA* 92(8):3209–3213.
7. Hillier W, Messinger J, Wydrzynski T (1998) Kinetic determination of the fast exchanging substrate water molecule in the  $\text{S}_2$  state of photosystem II. *Biochemistry* 37(48):16908–16914.
8. Hillier W, Wydrzynski T (2004) Substrate water interactions within the Photosystem II oxygen evolving complex. *Phys Chem Chem Phys* 6(20):4882–4889.
9. Ames W, et al. (2011) Theoretical evaluation of structural models of the  $\text{S}_2$  state in the oxygen evolving complex of Photosystem II: Protonation states and magnetic interactions. *J Am Chem Soc* 133(49):19743–19757.
10. Perdew JP (1986) Density-functional approximation for the correlation energy of the inhomogeneous electron gas. *Phys Rev B Condens Matter* 33(12):8822–8824.
11. Becke AD (1988) Density-functional exchange-energy approximation with correct asymptotic behavior. *Phys Rev A* 38(6):3098–3100.
12. Grimme S, Antony J, Ehrlich S, Krieg H (2010) A consistent and accurate ab initio parametrization of density functional dispersion correction (DFT-D) for the 94 elements H-Pu. *J Chem Phys* 132(15):154104–154119.
13. van Lenthe E, Baerends EJ, Snijders JG (1993) Relativistic regular two-component Hamiltonians. *J Chem Phys* 99(6):4597–4610.
14. Van Lenthe E, Baerends EJ, Snijders JG (1994) Relativistic total-energy using regular approximations. *J Chem Phys* 101(11):9783–9792.
15. Van Wüllen C (1998) Molecular density functional calculations in the regular relativistic approximation: Method, application to coinage metal diatomics, hydrides, fluorides and chlorides, and comparison with first-order relativistic calculations. *J Chem Phys* 109:392–399.
16. Pantazis DA, Chen XY, Landis CR, Neese F (2008) All-electron scalar relativistic basis sets for third-row transition metal atoms. *J Chem Theory Comput* 4(6):908–919.
17. Weigend F (2006) Accurate Coulomb-fitting basis sets for H to Rn. *Phys Chem Chem Phys* 8(9):1057–1065.
18. Klant A, Schürmann D (1993) COSMO: A new approach to dielectric screening in solvents with explicit expressions for the screening energy and its gradient. *J Chem Soc Perkin Trans 2*:799–805.
19. Staroverov VN, Scuseria GE, Tao J, Perdew JP (2003) Comparative assessment of a new nonempirical density functional: Molecules and hydrogen-bonded complexes. *J Chem Phys* 119:12129–12137.
20. Neese F, Wennmohs F, Hansen A, Becker U (2009) Efficient, approximate and parallel Hartree-Fock and hybrid DFT calculations. A ‘chain-of-spheres’ algorithm for the Hartree-Fock exchange. *Chem Phys* 356(1–3):98–109.
21. Cox N, et al. (2011) Electronic structure of a weakly antiferromagnetically coupled  $\text{Mn}^{\text{II}}/\text{Mn}^{\text{III}}$  model relevant to manganese proteins: A combined EPR,  $^{55}\text{Mn}$ -ENDOR, and DFT study. *Inorg Chem* 50(17):8238–8251.
22. Pantazis DA, et al. (2009) A new quantum chemical approach to the magnetic properties of oligonuclear transition-metal complexes: Application to a model for the tetranuclear manganese cluster of photosystem II. *Chemistry* 15(20):5108–5123.
23. Orio M, Pantazis DA, Petrenko T, Neese F (2009) Magnetic and spectroscopic properties of mixed valence manganese(III,IV) dimers: A systematic study using broken symmetry density functional theory. *Inorg Chem* 48(15):7251–7260.
24. Neese F, et al. (2010) Dealing with complexity in open-shell transition metal chemistry from a theoretical perspective: Reaction pathways, bonding, spectroscopy, and magnetic properties. *Adv Inorg Chem* 62:301–349.
25. Pantazis DA, Ames W, Cox N, Lubitz W, Neese F (2012) Two interconvertible structures that explain the spectroscopic properties of the oxygen-evolving complex of photosystem II in the  $\text{S}_2$  state. *Angew Chem Int Ed Engl* 51(39):9935–9940.
26. Cox N, et al. (2011) Effect of  $\text{Ca}^{2+}/\text{Sr}^{2+}$  substitution on the electronic structure of the oxygen-evolving complex of photosystem II: A combined multifrequency EPR,  $^{55}\text{Mn}$ -ENDOR, and DFT study of the  $\text{S}_2$  state. *J Am Chem Soc* 133(10):3635–3648.
27. Pantazis DA, et al. (2009) Structure of the oxygen-evolving complex of photosystem II: Information on the  $\text{S}_2$  state through quantum chemical calculation of its magnetic properties. *Phys Chem Chem Phys* 11(31):6788–6798.
28. Neese F (2012) The ORCA program system. *Comput Mol Sci* 2(1):73–78.
29. Peloquin JM, et al. (2000)  $^{55}\text{Mn}$  ENDOR of the  $\text{S}_2$ -state multiline EPR signal of photosystem II: Implications on the structure of the tetranuclear Mn cluster. *J Am Chem Soc* 122(44):10926–10942.
30. Stoll S, Schweiger A (2006) EasySpin, a comprehensive software package for spectral simulation and analysis in EPR. *J Magn Reson* 178(1):42–55.



31. Teutloff C, et al. (2009) Electronic structure of the tyrosine D radical and the water-splitting complex from pulsed ENDOR spectroscopy on photosystem II single crystals. *Phys Chem Chem Phys* 11(31):6715–6726.
32. Schinzel S, Schraut J, Arbužnikov AV, Siegbahn PE, Kaupp M (2010) Density functional calculations of  $^{55}\text{Mn}$ ,  $^{14}\text{N}$  and  $^{13}\text{C}$  electron paramagnetic resonance parameters support an energetically feasible model system for the  $S_2$  state of the oxygen-evolving complex of photosystem II. *Chemistry* 16(34):10424–10438.
33. Britt RD, Zimmermann JL, Sauer K, Klein MP (1989) Ammonia binds to the catalytic manganese of the oxygen-evolving complex of photosystem II. Evidence by electron spin-echo envelope modulation spectroscopy. *J Am Chem Soc* 111(10):3522–3532.
34. Dilbeck PL, et al. (2012) The D1-D61N mutation in *Synechocystis* sp. PCC 6803 allows the observation of pH-sensitive intermediates in the formation and release of  $\text{O}_2$  from photosystem II. *Biochemistry* 51(6):1079–1091.
35. Rivalta I, et al. (2011) Structural-functional role of chloride in photosystem II. *Biochemistry* 50(29):6312–6315.
36. Pokhrel R, McConnell IL, Brudvig GW (2011) Chloride regulation of enzyme turnover: Application to the role of chloride in photosystem II. *Biochemistry* 50(14):2725–2734.
37. Yeagle GJ, Gilchrist ML, Jr., Walker LM, Debus RJ, Britt RD (2008) Multifrequency electron spin-echo envelope modulation studies of nitrogen ligation to the manganese cluster of photosystem II. *Philos Trans R Soc Lond B Biol Sci* 363(1494):1157–1166, discussion 1166.
38. Stich TA, Yeagle GJ, Service RJ, Debus RJ, Britt RD (2011) Ligation of D1-His332 and D1-Asp170 to the manganese cluster of photosystem II from *Synechocystis* assessed by multifrequency pulse EPR spectroscopy. *Biochemistry* 50(34):7390–7404.
39. Kawamori A, Inui T, Ono T, Inoue Y (1989) ENDOR study on the position of hydrogens close to the manganese cluster in  $S_2$  state of photosystem II. *FEBS Lett* 254(1–2):219–224.
40. Aznar CP, Britt RD (2002) Simulations of the  $^1\text{H}$  electron spin echo-electron nuclear double resonance and  $^2\text{H}$  electron spin echo envelope modulation spectra of exchangeable hydrogen nuclei coupled to the  $S_2$ -state photosystem II manganese cluster. *Philos Trans R Soc Lond B Biol Sci* 357(1426):1359–1365, discussion 1365–1367.
41. Britt RD, et al. (2004) Recent pulsed EPR studies of the photosystem II oxygen-evolving complex: Implications as to water oxidation mechanisms. *Biochim Biophys Acta* 1655(1–3):158–171.
42. Schosseler P, Wacker T, Schweiger A (1994) Pulsed ELDOR detected NMR. *Chem Phys Lett* 224(3–4):319–324.

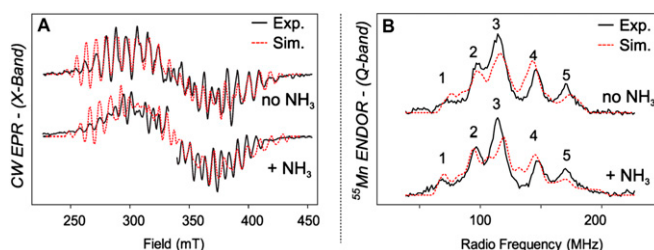

**Fig. S1.** X-band CW-EPR and Q-band pulse-EPR  $^{55}\text{Mn}$ -ENDOR spectra of the control and  $\text{NH}_3$ -containing OEC of PSII derived from *Thermosynechococcus elongatus* poised in the  $S_2$  state (1, 2). (A) X-band CW EPR. The  $S_1$ -state background of cyt b559 and cyt c550 was subtracted from the data after illumination. In native samples, a point mutation was made to replace the tyrosine  $\text{Y}_D$  (D2-Tyr160) with a phenylalanine, removing from the spectrum the  $\text{Y}_D^*$  signal. In samples, treated with ammonia, the  $\text{Y}_D^*$  signal, centered at about  $g \approx 2$ , was removed for clarity of presentation. Experimental parameters: microwave frequencies, 9.4097 GHz (control) and 9.4075 GHz ( $\text{NH}_3$ ); microwave power, 20 mW; modulation amplitude, 25 G; time constant, 80 ms; temperature, 8.6 K. (B) Q-band pulse  $^{55}\text{Mn}$ -Davies ENDOR. The  $S_1$ -state spectrum was subtracted from the  $S_2$ -state data to remove a small  $\text{Mn}^{2+}$  contamination. Experimental parameters: microwave frequencies, 34.0368 GHz (native) and 34.0159 GHz ( $\text{NH}_3$ ); magnetic field, 1,220 mT; shot repetition time, 1 ms; microwave pulse length ( $\pi$ ), 24 ns;  $\tau$ , 268 ns; radio frequency pulse ( $\pi_{\text{RF}}$ ), 3.5  $\mu\text{s}$ ; temperature, 5.2 K. The red dotted lines represent a least-squares fitting to the whole dataset, using a model based on the spin Hamiltonian formalism. The optimized parameter sets are given in Table S2.

1. Boussac A, Sugiura M, Inoue Y, Rutherford AW (2000) EPR study of the oxygen evolving complex in His-tagged photosystem II from the cyanobacterium *Synechococcus elongatus*. *Biochemistry* 39(45):13788–13799.
2. Boussac A, Rutherford AW, Styring S (1990) Interaction of ammonia with the water splitting enzyme of photosystem II. *Biochemistry* 29(1):24–32.

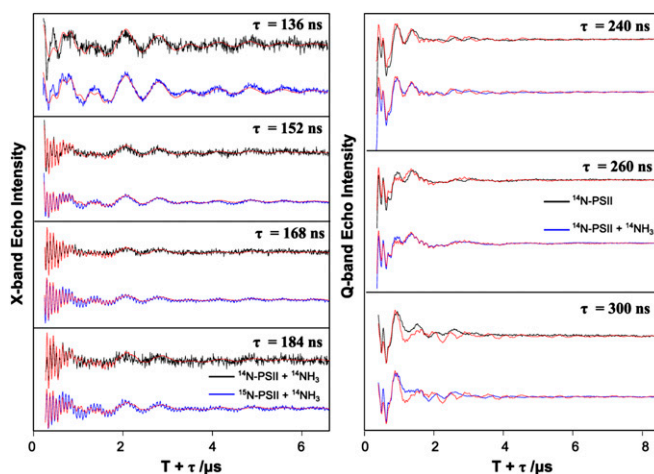

**Fig. S2.** (Left) X-band three-pulse ESEEM annealed-minus-dark difference spectra of ammonia ( $^{14}\text{NH}_3$ )-treated  $^{14}\text{N}$ -PSII and  $^{15}\text{N}$ -PSII (SI Materials and Methods). (Right) Q-band three-pulse ESEEM light-minus-dark and annealed-minus-dark difference spectra of control and ammonia ( $^{14}\text{NH}_3$ )-treated  $^{14}\text{N}$ -PSII, respectively. Spectra were collected using the sequence  $t_p - \tau - t_p - T - t_p - \tau - \text{echo}$ , where the length of the  $\pi/2$  microwave pulse was set to  $t_p = 8$  ns (X-band) and  $t_p = 12$  ns (Q-band); the interpulse distance ( $\tau$ ) was set to the values  $\tau = 136, 152, 168,$  and  $184$  ns (X-band) and  $\tau = 240, 260,$  and  $300$  ns (Q-band); and the interpulse distance ( $T$ ) was swept over the range from 64 to 6,464 ns in steps of  $\Delta T = 8$  ns (X-band) and from 100 to 8,176 ns in steps of  $\Delta T = 16$  ns (Q-band). Experimental parameters:  $B_0 = 333$  mT (X-band), 1.22 T (Q-band); temperature, 4.2 K (X-band), 5.2 K (Q-band); shot repetition time of 5 ms (X-band), 1 ms (Q-band). The red dashed lines superimposing the data represent simulations using the spin Hamiltonian formalism (Table S4). The modulation due to protons in the X-band data was simulated using a single, isolated  $^1\text{H}$  species. The decay of the ESEEM traces (data and simulations) was fitted to a third-order polynomial (X-band) and a biexponential decay (Q-band) function. A low-pass filter (3 dB, 10 MHz) was applied to the Q-band ESEEM simulations in an attempt to model the resonator bandwidth.



**Table S1. Principal values of the effective  $G$  and hyperfine tensors ( $A_i$ ) for the EPR and  $^{55}\text{Mn}$ -ENDOR simulations (Fig. S1)**

| Sample           | $G$   | $A_i$ , MHz |       |       |       |
|------------------|-------|-------------|-------|-------|-------|
|                  |       | $A_1$       | $A_2$ | $A_3$ | $A_4$ |
| Control          |       |             |       |       |       |
| x                | 1.988 | 321         | 259   | 191   | 161   |
| y                | 1.978 | 345         | 244   | 219   | 179   |
| z                | 1.974 | 273         | 272   | 249   | 230   |
| iso              | 1.980 | 313         | 258   | 220   | 190   |
| aniso            | 0.009 | 60          | -20   | -44   | -60   |
| +NH <sub>3</sub> |       |             |       |       |       |
| x                | 1.993 | 314         | 230   | 185   | 167   |
| y                | 1.974 | 379         | 264   | 215   | 153   |
| z                | 1.964 | 248         | 279   | 244   | 218   |
| iso              | 1.981 | 321         | 246   | 209   | 170   |
| aniso            | 0.019 | 98          | -31   | -44   | -58   |

The isotropic  $G$  and  $A_i$  ( $i = 1-4$ ) values are the average of the individual values:  $G_{iso} = (G_x + G_y + G_z)/3$  and  $A_{i,iso} = (A_{i,x} + A_{i,y} + A_{i,z})/3$ . The anisotropy in the  $G$  and  $A_i$  values is expressed as the difference between equatorial (average of  $x$  and  $y$ ) and the axial ( $z$ ) components of the tensor.

**Table S2. Fitted and DFT-calculated spin Hamiltonian parameters for the  $^{14}\text{NH}_3$  ligand and the  $^{14}\text{N}$ -His332 ligand of the OEC: Comparison with literature values**

| OEC ligand                            | Spin Hamiltonian parameters/MHz |                   |                   |        |
|---------------------------------------|---------------------------------|-------------------|-------------------|--------|
|                                       | $ A_{iso} $                     | $A_{dip}^*$       | $ e^2Qq/h $       | $\eta$ |
| $^{14}\text{NH}_3$                    |                                 |                   |                   |        |
| Experiment                            | 2.36                            | 0.41, 0.26, -0.67 | 1.52              | 0.47   |
| DFT 1d2'-NH <sub>3</sub> <sup>†</sup> | 1.46                            | 0.78, 0.73, -1.51 | 2.52              | 0.06   |
| (1)                                   | 2.29                            | 0.2, 0.2, -0.4    | 1.61              | 0.59   |
| $^{14}\text{N}$ -His332               |                                 |                   |                   |        |
| Experiment                            | 7.17                            | 0.11, 1.43, -1.54 | 2.00 <sup>‡</sup> | 0.81   |
| DFT 1d2' <sup>†</sup>                 | 4.83                            | 1.17, 0.97, -2.14 | 2.13              | 0.78   |
| DFT 1d2'-NH <sub>3</sub> <sup>†</sup> | 5.23                            | 1.16, 0.97, -2.13 | 2.15              | 0.77   |
| (2)                                   | 6.95                            | 0.2, 1.3, -1.5    | 1.98 <sup>‡</sup> | 0.82   |

\*Theoretical  $A_{dip}$  values represent a multipole estimate as described in Force et al. (3).

<sup>†</sup>The 1d2' model as reported in Ames et al. (4). 1d2'-NH<sub>3</sub> is an optimized DFT model with NH<sub>3</sub> bound instead of W1.

<sup>‡</sup>The quadrupole tensor was rotated relative to the hyperfine tensor around the Euler angles  $[\alpha \ \beta \ \gamma] = [0 \ -13 \ 26]^\circ$ , similar to ref. 2, where  $[\alpha \ \beta \ \gamma] = [-30 \ 0 \ 40]^\circ$ .

- Britt RD, Zimmermann JL, Sauer K, Klein MP (1989) Ammonia binds to the catalytic manganese of the oxygen-evolving complex of photosystem II. Evidence by electron spin-echo envelope modulation spectroscopy. *J Am Chem Soc* 111(10):3522-3532.
- Stich TA, Yeagle GJ, Service RJ, Debus RJ, Britt RD (2011) Ligation of D1-His332 and D1-Asp170 to the manganese cluster of photosystem II from *Synechocystis* assessed by multifrequency pulse EPR spectroscopy. *Biochemistry* 50(34):7390-7404.
- Force DA, Randall DW, Lorigan GA, Clemens KL, Britt RD (1998) ESEEM studies of alcohol binding to the manganese cluster of the oxygen evolving complex of photosystem II. *J Am Chem Soc* 120(51):13321-13333.
- Ames W, et al. (2011) Theoretical evaluation of structural models of the S<sub>2</sub> state in the oxygen evolving complex of Photosystem II: Protonation states and magnetic interactions. *J Am Chem Soc* 133(49):19743-19757.

**Table S3. Fitted spin Hamiltonian parameters for the exchangeable  $^{17}\text{O}$  ligands of the OEC in the presence and absence of ammonia**

| $^{17}\text{O}$ signal | Fitted spin Hamiltonian parameters/MHz |                  |           | BS-DFT calculations/<br>MHz |      |
|------------------------|----------------------------------------|------------------|-----------|-----------------------------|------|
|                        | $ A_{\text{iso}} $                     | $A_{\text{dip}}$ | $A(\eta)$ | $ A_{\text{iso}} $          | Site |
| Strong                 | 9.7                                    | 2.2              | 0.55      | —                           | —    |
| Intermediate           | 4.5                                    | 0.6              | 0.08      | 5.20                        | W2   |
| Matrix                 | 1.4                                    | 0.6              | 0.06      | 1.69                        | W1   |
| $\text{NH}_3$          |                                        |                  |           |                             |      |
| Strong                 | 7.0                                    | 2.2              | 0.55      | —                           | —    |
| Intermediate           | 3.1                                    | 0.6              | 0.08      | 4.32                        | W2   |
| Matrix                 | —                                      | —                | —         | —                           | —    |

EDNMR linewidth for  $^{17}\text{O}$  signals: strong, 3.5 MHz [single quantum (SQ)], 7.4 MHz [double quantum (DQ)]; intermediate, 3.3 MHz (SQ), 5.0 MHz (DQ); and matrix, 2.2 MHz (SQ), 3.8 MHz (DQ).

**Table S4. Calculated  $^{17}\text{O}$   $\mu$ -oxo bridge hyperfine couplings: Comparison with experimental parameters**

| Method                       | $S_T$ | $\Delta E/\text{cm}^{-1}$ | $^{17}\text{O}$ $\mu$ -oxo bridge hyperfine couplings<br>$ A_{\text{iso}} /\text{MHz}^*$ |       |                           |      |       |
|------------------------------|-------|---------------------------|------------------------------------------------------------------------------------------|-------|---------------------------|------|-------|
|                              |       |                           | O1                                                                                       | O2    | O3                        | O4   | O5    |
| DFT                          |       |                           |                                                                                          |       |                           |      |       |
| $1d2'^{\dagger}$             | 1/2   | 25.6                      | 0.52                                                                                     | 23.05 | 4.90                      | 4.48 | 17.41 |
| $1d2'-\text{NH}_3^{\dagger}$ | 1/2   | 27.6                      | 1.07                                                                                     | 23.19 | 4.81                      | 5.34 | 12.21 |
| $\Delta^{\ddagger}$          | —     | 2.0                       | 0.55                                                                                     | 0.14  | -0.09                     | 0.86 | -5.20 |
| $\Delta, \%^{\ddagger}$      |       | 7.8                       | 106                                                                                      | 1     | -2                        | 19   | -30   |
| Experiment                   |       |                           |                                                                                          |       |                           |      |       |
| Native                       | 1/2   | —                         |                                                                                          |       | 9.7                       |      |       |
| $+\text{NH}_3$               | 1/2   | —                         |                                                                                          |       |                           |      | 7.0   |
| $\Delta^{\ddagger}$          | —     | —                         |                                                                                          |       | 2.7                       |      |       |
| $\Delta, \%^{\ddagger}$      |       |                           |                                                                                          |       | $-28 \geq \text{O5}^{\S}$ |      |       |

$\Delta E$ , energy-gap between the ground and first excited spin state.

\*Calculated (raw) BS-DFT hyperfine values are not directly comparable to experiment; the percentage change ( $\Delta$ ) due to ammonia binding can, however, be compared.

$^{\dagger}$ The  $1d2'$  model as reported in Ames et al. (9).  $1d2'-\text{NH}_3$  is an optimized DFT model with  $\text{NH}_3$  bound instead of W1.

$^{\ddagger}$  $\Delta$  = difference between control and  $+\text{NH}_3$  samples.

$^{\S}$ The experimental 28% decrease in the oxo bridge hyperfine best matches O5.

**Table S5. Optimized model geometries used for EPR parameter and vibrational frequency calculations**

| DFT model | x/Å      | y/Å      | z/Å      |
|-----------|----------|----------|----------|
| 1d2'      |          |          |          |
| Atom      |          |          |          |
| Mn        | 29.19414 | 36.61847 | 65.00569 |
| Mn        | 28.9668  | 36.43165 | 67.6823  |
| Mn        | 29.01561 | 38.18004 | 69.82962 |
| Mn        | 26.62394 | 38.66455 | 68.47251 |
| Ca        | 29.67399 | 39.73626 | 66.98265 |
| O         | 28.45455 | 37.61803 | 66.31241 |
| O         | 30.00886 | 35.70723 | 66.38433 |
| O         | 30.065   | 37.71235 | 68.40141 |
| O         | 28.18288 | 39.5523  | 68.91232 |
| O         | 27.66949 | 37.12485 | 68.98152 |
| H         | 33.26521 | 35.97244 | 63.9053  |
| C         | 33.39239 | 36.9531  | 63.41026 |
| H         | 34.41265 | 36.98277 | 62.98899 |
| C         | 33.18412 | 38.1003  | 64.4023  |
| C         | 31.81431 | 38.16099 | 65.07295 |
| O         | 31.64374 | 38.90592 | 66.0647  |
| O         | 30.89382 | 37.43168 | 64.51395 |
| H         | 23.41284 | 44.20104 | 66.83036 |
| C         | 23.14235 | 43.30812 | 66.23537 |
| H         | 22.05665 | 43.14138 | 66.35523 |
| C         | 23.94833 | 42.07976 | 66.67913 |
| C         | 25.46034 | 42.28601 | 66.52075 |
| C         | 26.33971 | 41.10987 | 66.91852 |
| O         | 27.54446 | 41.08187 | 66.55113 |
| O         | 25.76884 | 40.18857 | 67.63863 |
| H         | 20.97205 | 34.9217  | 66.73777 |
| C         | 21.79667 | 34.56477 | 66.09691 |
| C         | 22.62626 | 33.58101 | 66.91447 |
| C         | 22.67446 | 35.75242 | 65.61673 |
| C         | 23.51361 | 36.39167 | 66.68698 |
| N         | 23.0952  | 36.51948 | 68.00583 |
| C         | 24.74607 | 37.02593 | 66.64159 |
| C         | 24.0326  | 37.18614 | 68.71421 |
| N         | 25.04427 | 37.51441 | 67.90507 |
| N         | 23.39158 | 32.71597 | 66.19706 |
| C         | 24.54488 | 32.0307  | 66.78717 |
| H         | 24.22685 | 31.56093 | 67.73365 |
| C         | 25.70247 | 33.00813 | 67.05431 |
| C         | 26.16809 | 33.7335  | 65.79022 |
| C         | 27.20746 | 34.80999 | 66.03121 |
| O         | 27.51408 | 35.11177 | 67.22407 |
| O         | 27.70084 | 35.35641 | 64.97236 |
| H         | 26.17566 | 32.17784 | 73.8084  |
| C         | 26.68915 | 33.03106 | 74.28791 |
| H         | 26.75269 | 32.8301  | 75.37319 |
| C         | 25.94358 | 34.34991 | 74.00002 |
| C         | 25.82893 | 34.64465 | 72.53042 |
| N         | 24.80965 | 34.12276 | 71.74217 |
| C         | 26.694   | 35.38315 | 71.73127 |
| C         | 25.05611 | 34.54574 | 70.49867 |
| N         | 26.18938 | 35.30448 | 70.44992 |
| H         | 26.4334  | 38.28926 | 75.03005 |
| C         | 26.97487 | 38.34995 | 74.06977 |
| H         | 27.68597 | 39.19239 | 74.12322 |
| C         | 25.99156 | 38.52463 | 72.91222 |
| C         | 26.61796 | 38.59626 | 71.52631 |
| O         | 27.89489 | 38.44788 | 71.45365 |
| O         | 25.83464 | 38.77529 | 70.53788 |
| C         | 31.08901 | 40.1793  | 70.05314 |
| O         | 30.97748 | 40.51983 | 68.85136 |







Table S5. Cont.

| DFT model | $x/\text{Å}$ | $y/\text{Å}$ | $z/\text{Å}$ |
|-----------|--------------|--------------|--------------|
| H         | 30.91212     | 33.63988     | 74.57757     |
| C         | 30.34207     | 34.59037     | 72.68664     |
| C         | 30.08174     | 34.22837     | 71.22035     |
| C         | 29.73268     | 35.3885      | 70.30494     |
| O         | 29.65        | 36.55815     | 70.82011     |
| O         | 29.52379     | 35.0971      | 69.07459     |
| O         | 22.63212     | 33.64156     | 68.16378     |
| H         | 32.64395     | 37.33271     | 62.40745     |
| H         | 23.33231     | 32.74842     | 65.1982      |
| H         | 26.61563     | 35.82718     | 69.6621      |
| H         | 27.68996     | 33.06006     | 73.87756     |
| H         | 23.29614     | 43.60325     | 65.31689     |
| H         | 31.69436     | 32.9252      | 73.13928     |
| H         | 33.96276     | 38.11455     | 65.11608     |
| H         | 33.29138     | 39.25805     | 63.9558      |
| H         | 26.44387     | 35.17345     | 74.50128     |
| H         | 24.90083     | 34.29822     | 74.42841     |
| H         | 27.58398     | 35.95587     | 71.96173     |
| H         | 24.42251     | 34.36841     | 69.61547     |
| H         | 23.95416     | 37.43523     | 69.74653     |
| H         | 25.43716     | 37.11327     | 65.79072     |
| H         | 22.25621     | 36.07664     | 68.38556     |
| H         | 24.83963     | 31.22306     | 66.13913     |
| C         | 32.09504     | 40.84653     | 70.92733     |
| H         | 31.69138     | 41.0155      | 71.93913     |
| H         | 32.9616      | 40.16622     | 71.02109     |
| H         | 32.43528     | 41.79442     | 70.48261     |
| H         | 31.12589     | 35.36899     | 72.73767     |
| H         | 29.43042     | 35.0494      | 73.11437     |
| H         | 30.95714     | 33.71789     | 70.77268     |
| H         | 29.24247     | 33.5093      | 71.13545     |
| H         | 23.58046     | 41.26812     | 66.30434     |
| H         | 25.65847     | 42.48922     | 65.45299     |
| H         | 23.83853     | 41.96767     | 67.90357     |
| H         | 25.91014     | 43.15412     | 67.06524     |
| H         | 21.99747     | 36.49542     | 65.13914     |
| H         | 21.32706     | 34.05997     | 65.20558     |
| H         | 23.33661     | 35.39808     | 64.7911      |
| H         | 27.53211     | 37.42481     | 73.93458     |
| H         | 25.34557     | 39.43297     | 73.00199     |
| H         | 25.25336     | 37.67509     | 72.83987     |
| H         | 25.35394     | 33.78164     | 67.79864     |
| H         | 25.33028     | 34.23023     | 65.29115     |
| H         | 26.57369     | 32.9981      | 65.06393     |
| H         | 26.52601     | 32.48263     | 67.55564     |
| O         | 29.1129      | 39.96224     | 64.51792     |
| H         | 28.27681     | 40.44473     | 64.68325     |
| H         | 28.81983     | 39.06806     | 64.14843     |
| O         | 28.51217     | 37.49962     | 63.55323     |
| H         | 30.34963     | 42.45934     | 67.47842     |
| O         | 30.04879     | 42.12468     | 66.61083     |
| H         | 29.08907     | 42.33828     | 66.57039     |
| H         | 29.1594      | 37.55246     | 62.82261     |
| N         | 30.03583     | 35.04332     | 63.67935     |
| H         | 30.8881      | 35.37261     | 63.21632     |
| H         | 29.35264     | 34.77193     | 62.96706     |
| H         | 30.27283     | 34.21138     | 64.22815     |
